# Supplementary material
Source: publisher figshare collection journal article supplement (https://acs.figshare.com/ndownloader/files/25858843)
Supplement: Supplementary file 1 [file 25858843]

*Supporting Information*

**Top-Down Syntheses of Nickel-Based Structured Catalysts for Hydrogen Production from Ammonia**

Yu-Jin Lee<sup>1†,2‡</sup>, Junyoung Cha<sup>1†</sup>, Yeonsu Kwak<sup>1†</sup>, Yongha Park<sup>1†</sup>, Young Suk Jo<sup>1†</sup>, Hyangsoo Jeong<sup>1†,4||</sup>,  
Hyuntae Sohn<sup>1†</sup>, Chang Won Yoon<sup>1†,3§,4||</sup>, Yongmin Kim<sup>\*1†</sup>, Kwang-Bum Kim<sup>\*2‡</sup>, Suk Woo Nam<sup>\*1†</sup>

<sup>†</sup>Center for Hydrogen and Fuel Cell Research, Korea Institute of Science and Technology, Seoul 02792, Republic of Korea

<sup>‡</sup>Department of Material Science & Engineering, Yonsei University, Seoul 03722, Republic of Korea

<sup>§</sup>KHU-KIST Department of Converging Science and Technology, Kyung Hee University, Seoul 02447, Republic of Korea

<sup>||</sup>Division of Energy and Environment Technology, KIST School, Korea University of Science and Technology, Seoul 02792, Republic of Korea

\* Email: yongminkim@kist.re.kr

\* Email: kbkim@yonsei.ac.kr

\* Email: swn@kist.re.kr

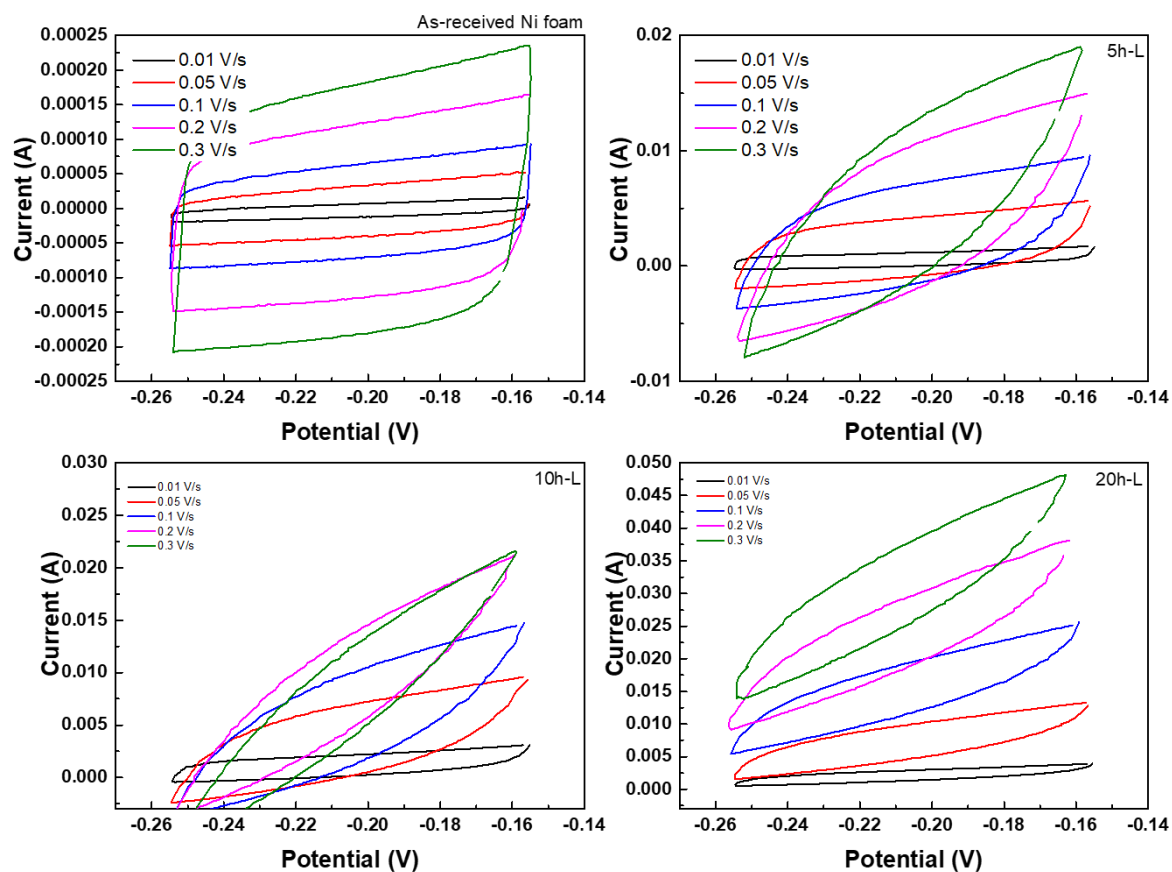

**Figure S1.** Cyclic voltammetry graphs of the as-received Ni foam, 5 h-L, 10 h-L, and 20 h-L in 0.5 M KOH solution at different scan rates.

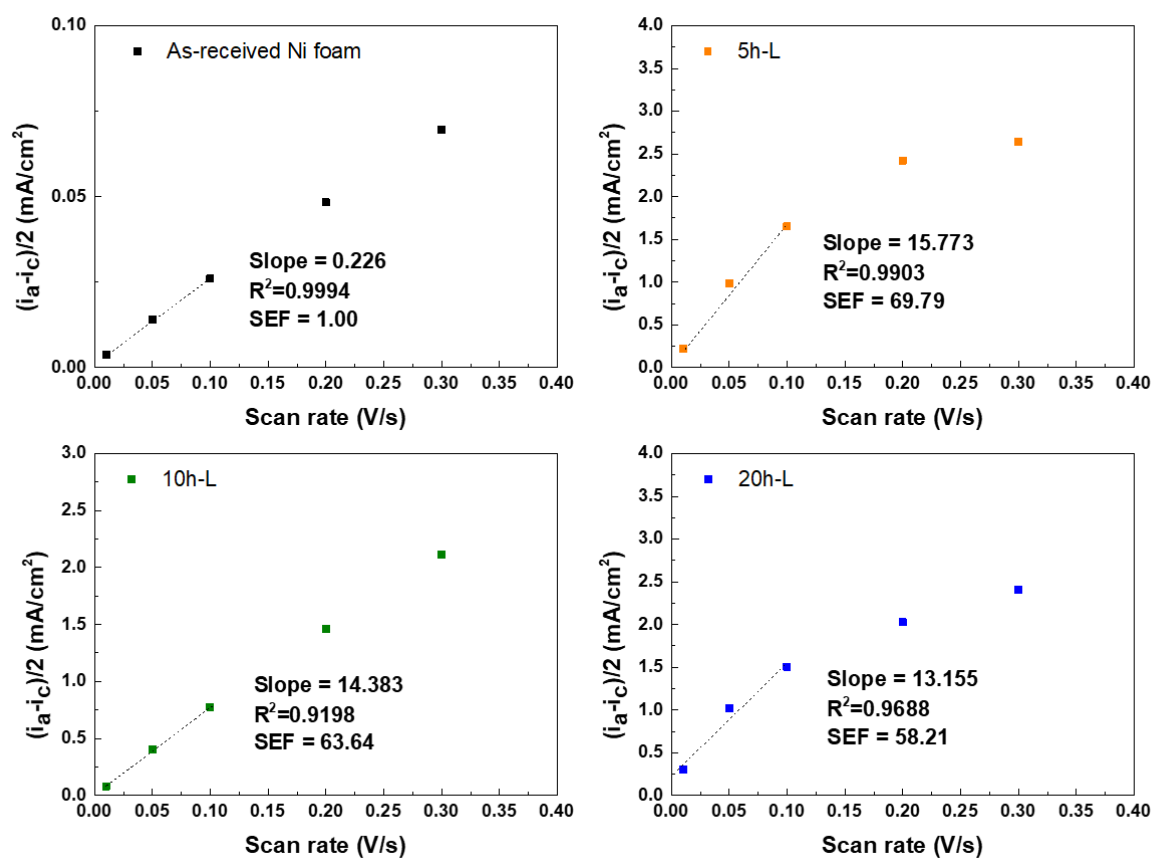

**Figure S2.**  $(i_a - i_c)/2$  at a center voltage of -0.205V vs. scan rate (V/s) graphs derived from **Figure S1**.

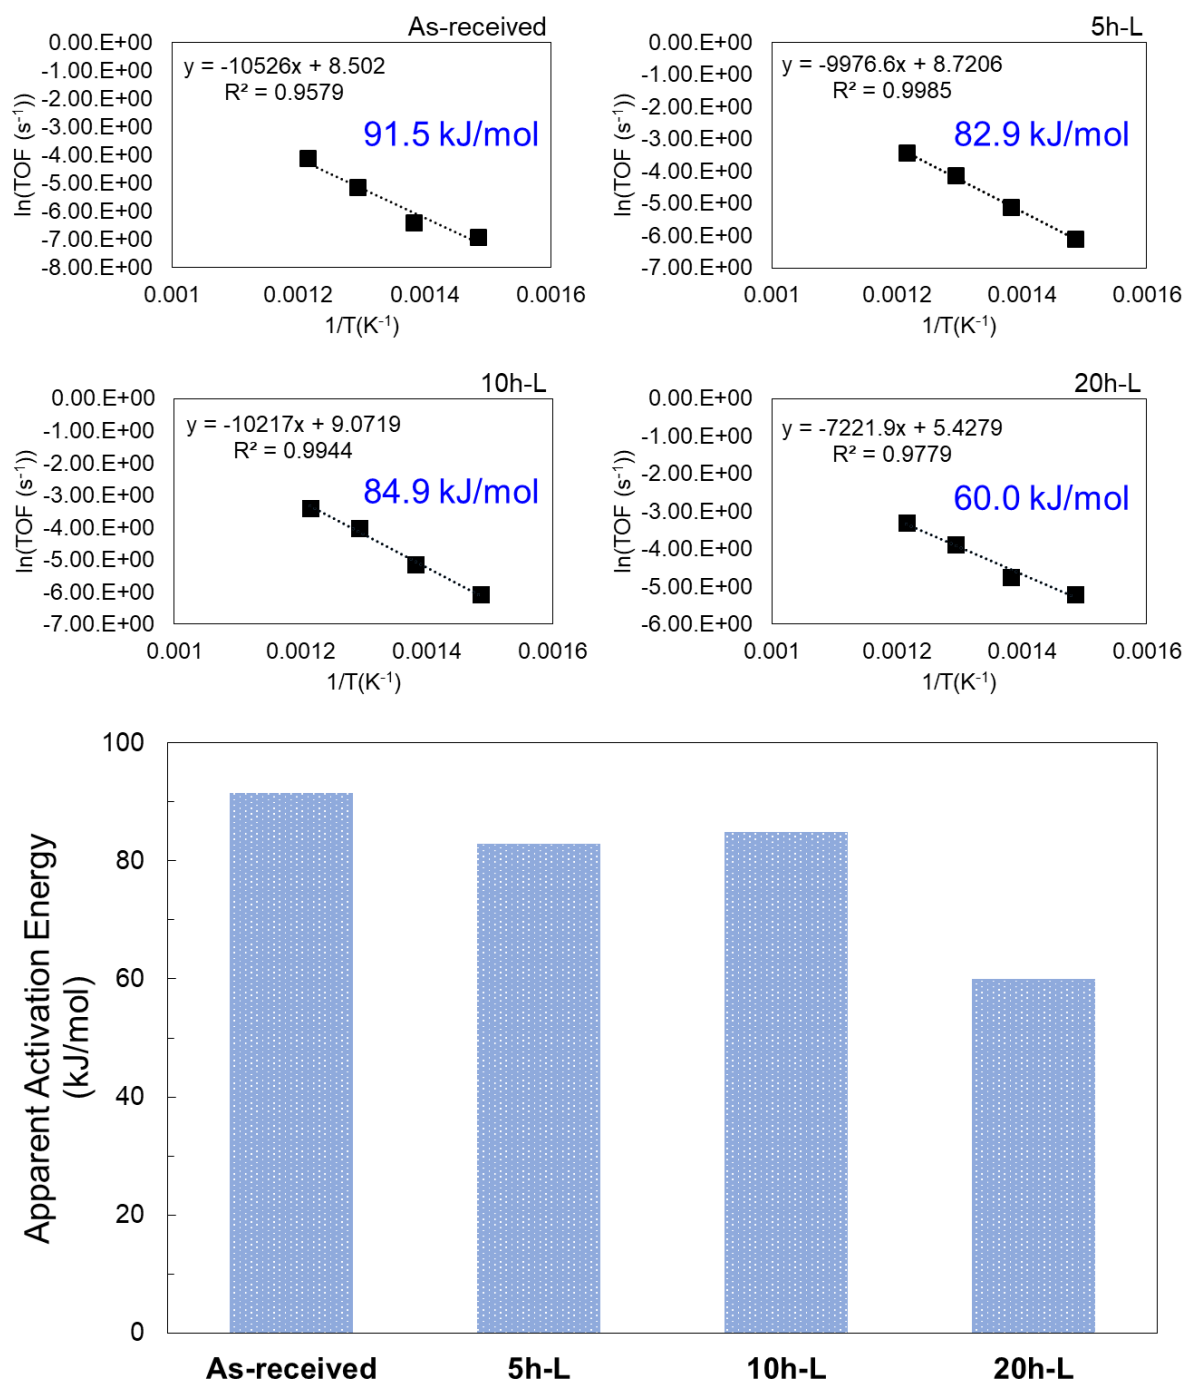

**Figure S3.** Apparent activation energy of as-received Ni foam, 5 h-L, 10 h-L, and 20 h-L catalysts calculated from **Figure 3a**.

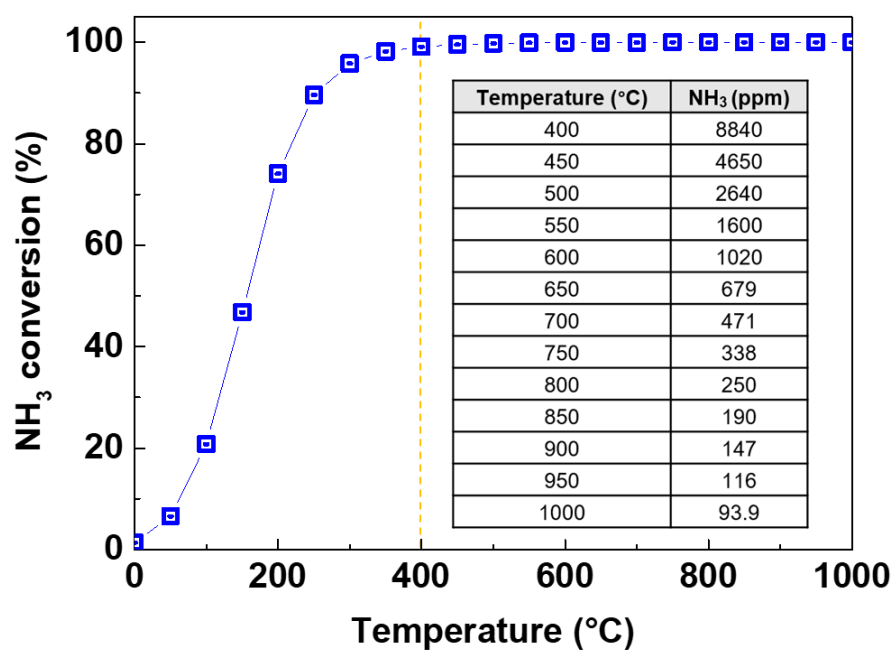

**Figure S4.** Thermodynamic equilibrium of ammonia, nitrogen and hydrogen at 0 °C–1000 °C calculated using HSC Chemistry 10 by Gibbs energy minimization method. (inset: the calculated value of residue ammonia concentration in ppm).

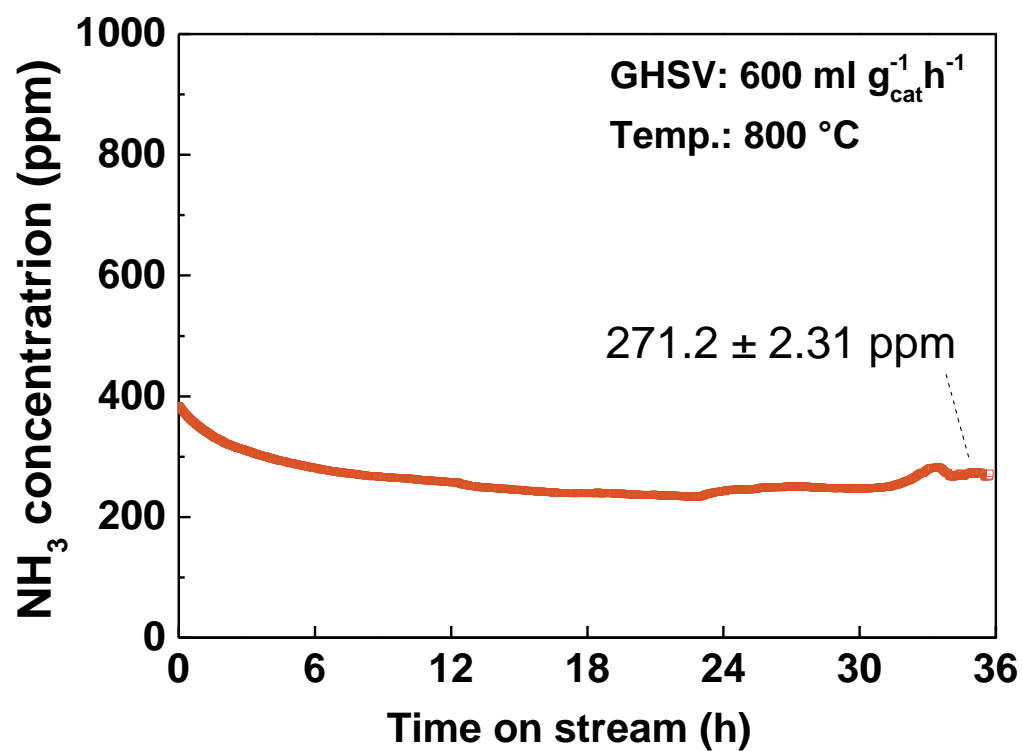

**Figure S5.** High-temperature durability test of the 20 h-L catalyst sample operating for 36 h at a temperature of 800 °C and GHSV of 600 ml g<sub>cat</sub><sup>-1</sup>h<sup>-1</sup>.

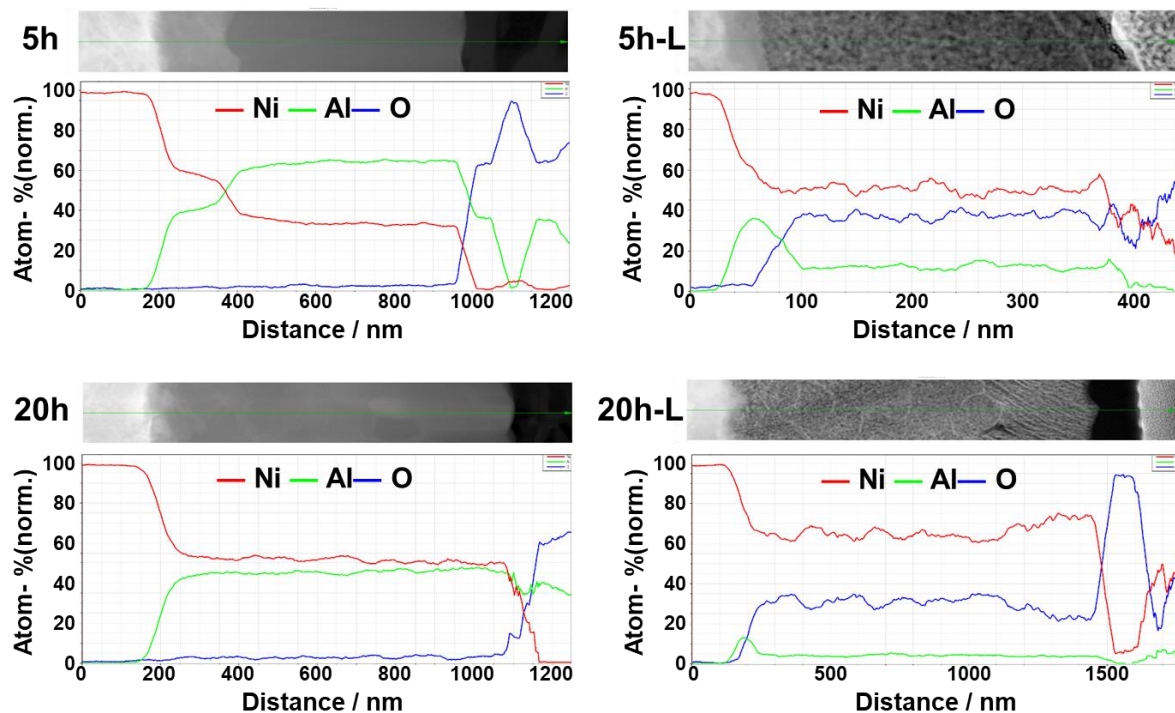

**Figure S6.** EDS line-scanning profiles of each sample (red, Ni; green, Al; blue, O) corresponding to TEM images of the samples (**Figure 4**).
